# Supplementary material for: PM sources in a highly industrialised area in the process of implementing PM abatement technology. Quantification and evolution
Source: Royal Society of Chemistry journal article supplement (doi:10.1039/b705474b), 2007-01-01
Supplement: b705474b.pdf [file b705474b.pdf]

**Table Electronic Supplementary Information 1. Speciation of PM<sub>10</sub> and levels of trace elements measured at Onda, L'Alcora, Vila-real and Borriana.**

|                                | Vila-real |      |      |      | L'Alcora |      |      |      | Onda |      |      |      | Borriana |      |
|--------------------------------|-----------|------|------|------|----------|------|------|------|------|------|------|------|----------|------|
|                                | 2002      | 2003 | 2004 | 2005 | 2002     | 2003 | 2004 | 2005 | 2002 | 2003 | 2004 | 2005 | 2004     | 2005 |
| n                              | 73        | 80   | 89   | 76   | 85       | 72   | 88   | 82   | 77   | 72   | 58   | 62   | 45       | 102  |
| µg/m <sup>3</sup>              |           |      |      |      |          |      |      |      |      |      |      |      |          |      |
| PM <sub>10</sub>               | 37        | 40   | 37   | 36   | 39       | 34   | 34   | 34   | 26   | 28   | 29   | 27   | 36       | 37   |
| OC+EC                          | 5.5       | 5.3  | 4.8  | 5.3  | 4.4      | 3.9  | 4.2  | 3.9  | 4.3  | 3.5  | 3.8  | 3.9  | 4.1      | 4.5  |
| CO <sub>3</sub> <sup>2-</sup>  | 3.3       | 3.5  | 2.9  | 3.3  | 3.6      | 3.1  | 2.8  | 3.3  | 2.0  | 2.2  | 1.8  | 2.3  | 2.3      | 2.3  |
| SiO <sub>2</sub>               | 5.8       | 6.8  | 4.9  | 5.3  | 9.0      | 6.9  | 6.6  | 6.7  | 3.3  | 4.9  | 3.4  | 3.8  | 6.4      | 6.5  |
| Al <sub>2</sub> O <sub>3</sub> | 1.9       | 2.3  | 1.6  | 1.8  | 3.0      | 2.3  | 2.2  | 2.2  | 1.1  | 1.6  | 1.1  | 1.3  | 2.1      | 2.2  |
| Ca                             | 1.8       | 1.9  | 1.6  | 1.8  | 2.0      | 1.7  | 1.5  | 1.8  | 1.0  | 1.1  | 0.9  | 1.2  | 1.1      | 1.2  |
| K                              | 0.8       | 0.9  | 0.6  | 0.5  | 1.0      | 0.8  | 0.7  | 0.6  | 0.5  | 0.6  | 0.4  | 0.4  | 0.7      | 0.6  |
| Na                             | 0.9       | 1.0  | 0.7  | 0.6  | 0.7      | 0.7  | 0.5  | 0.5  | 0.7  | 0.8  | 0.6  | 0.5  | 0.8      | 0.8  |
| Mg                             | 0.2       | 0.3  | 0.2  | 0.2  | 0.3      | 0.2  | 0.2  | 0.2  | 0.2  | 0.2  | 0.2  | 0.2  | 0.2      | 0.2  |
| Fe                             | 0.5       | 0.6  | 0.5  | 0.5  | 0.8      | 0.6  | 0.6  | 0.6  | 0.3  | 0.4  | 0.3  | 0.3  | 0.4      | 0.4  |
| Ti                             | 0.05      | 0.06 | 0.05 | 0.05 | 0.07     | 0.05 | 0.06 | 0.06 | 0.03 | 0.04 | 0.03 | 0.03 | 0.06     | 0.06 |
| P                              | 0.03      | 0.04 | 0.02 | 0.02 | 0.03     | 0.03 | 0.01 | 0.02 | 0.03 | 0.03 | 0.02 | 0.01 | 0.02     | 0.02 |
| SO <sub>4</sub> <sup>2-</sup>  | 4.8       | 5.0  | 4.7  | 4.2  | 4.5      | 3.9  | 4.1  | 4.1  | 4.5  | 4.2  | 4.3  | 4.1  | 4.9      | 4.4  |
| NO <sub>3</sub> <sup>-</sup>   | 2.8       | 1.3  | 1.1  | 2.0  | 1.7      | 1.0  | 0.9  | 1.5  | 1.7  | 0.74 | 0.7  | 1.4  | 1.1      | 1.7  |
| Cl <sup>-</sup>                | 0.3       | 0.4  | 0.2  | 0.2  | 0.2      | 0.2  | 0.1  | 0.1  | 0.2  | 0.2  | 0.1  | 0.1  | 0.2      | 0.2  |
| NH <sub>4</sub> <sup>+</sup>   | 1.0       | 0.5  | 0.6  | 0.8  | 0.9      | 0.5  | 0.6  | 0.9  | 1.0  | 0.5  | 0.6  | 0.9  | 0.8      | 0.9  |
| ng/m <sup>3</sup>              |           |      |      |      |          |      |      |      |      |      |      |      |          |      |
| Li                             | 1.6       | 1.5  | 1.0  | 1.0  | 1.9      | 1.5  | 1.5  | 1.3  | 0.8  | 0.9  | 0.7  | 0.6  | 1.0      | 1.1  |
| Sc                             | 0.7       | 0.4  | 0.1  | 0.4  | 0.9      | 0.6  | 0.1  | 0.5  | 0.4  | 0.4  | 0.1  | 0.3  | 0.1      | 0.4  |
| Ti                             | 48        | 59   | 49   | 51   | 69       | 52   | 56   | 57   | 28   | 39   | 29   | 33   | 56       | 56   |
| V                              | 7         | 8    | 6    | 5    | 6        | 5    | 4    | 4    | 4    | 5    | 4    | 4    | 6        | 5    |
| Cr                             | 4         | 5    | 5    | 7    | 7        | 5    | 6    | 8    | 3    | 3    | 3    | 3    | 6        | 6    |
| Co                             | 0.6       | 1.1  | 0.8  | 0.7  | 0.8      | 0.8  | 0.7  | 0.7  | 0.4  | 0.6  | 1    | 0.4  | 0.7      | 0.6  |
| Ni                             | 4         | 4    | 4    | 5    | 3        | 3    | 3    | 4    | 3    | 2    | 3    | 3    | 4        | 4    |
| Cu                             | 10        | 9    | 9    | 8    | 7        | 6    | 5    | 6    | 5    | 4    | 5    | 4    | 7        | 10   |
| Zn                             | 364       | 361  | 186  | 85.9 | 416      | 336  | 244  | 89.5 | 190  | 282  | 134  | 45   | 299      | 183  |
| As                             | 11.7      | 11.0 | 4.1  | 3.0  | 11.3     | 9.9  | 6.0  | 2.5  | 5.9  | 9.4  | 3.1  | 1.7  | 7.8      | 5.0  |
| Se                             | 2.4       | 2.3  | 2.2  | 1.8  | 3.2      | 3.3  | 2.9  | 2.5  | 1.6  | 1.4  | 1.2  | 1.0  | 2.6      | 2.1  |
| Rb                             | 3.4       | 3.2  | 2.0  | 1.9  | 4.9      | 3.3  | 3.0  | 2.4  | 1.9  | 2.1  | 1.4  | 1.2  | 2.6      | 2.4  |
| Sr                             | 5         | 5    | 4    | 3.9  | 6        | 5    | 4    | 4.5  | 4    | 4    | 3    | 3.1  | 4.3      | 4.3  |
| Y                              | 0.2       | 0.3  | 0.1  | 0.3  | 0.4      | 0.3  | 0.2  | 0.3  | 0.2  | 0.2  | 0.2  | 0.2  | 0.1      | 0.3  |
| Zr                             | 15        | 15   | 10   | 13   | 35       | 28   | 24   | 20   | 10   | 10   | 7    | 10   | 12       | 17   |
| Cd                             | 1.7       | 1.3  | 2.9  | 0.7  | 1.4      | 1.3  | 1.8  | 0.8  | 1.0  | 1.0  | 1.2  | 0.6  | 1.0      | 1.5  |
| Sn                             | 1.7       | 2.6  | 2.7  | 1.3  | 1.3      | 2.3  | 1.8  | 1.0  | 1.1  | 2.4  | 2.3  | 1.0  | 1.2      | 1.5  |
| Cs                             | 0.6       | 0.5  | 0.3  | 0.2  | 0.9      | 0.6  | 0.5  | 0.3  | 0.4  | 0.4  | 0.2  | 0.1  | 0.4      | 0.3  |
| Ba                             | 120       | 74   | 34   | 12   | 100      | 66   | 27   | 12   | 69   | 60   | 22   | 14   | 26       | 16   |
| La                             | 0.7       | 0.6  | 0.5  | 0.5  | 1.0      | 0.6  | 0.5  | 0.6  | 0.5  | 0.4  | 0.3  | 0.3  | 0.5      | 0.5  |
| Ce                             | 1.2       | 1.2  | 0.8  | 1.2  | 5.2      | 1.8  | 2.1  | 1.9  | 0.9  | 1.0  | 0.6  | 0.7  | 1.1      | 1.6  |
| Pr                             | 0.3       | 0.2  | 0.1  | 0.2  | 0.4      | 0.2  | 0.2  | 0.2  | 0.2  | 0.1  | 0.1  | 0.1  | 0.2      | 0.2  |
| Nd                             | 0.5       | 0.5  | 0.3  | 0.4  | 0.8      | 0.5  | 0.4  | 0.5  | 0.4  | 0.3  | 0.2  | 0.3  | 0.4      | 0.5  |
| Hf                             | 0.4       | 0.3  | 0.2  | 0.3  | 0.8      | 0.6  | 0.5  | 0.4  | 0.4  | 0.2  | 0.1  | 0.2  | 0.3      | 0.4  |
| Tl                             | 1.7       | 1.4  | 1.3  | 1.2  | 3.6      | 2.8  | 3.1  | 2.8  | 1.5  | 1.0  | 0.7  | 0.5  | 1.4      | 1.1  |
| Pb                             | 229       | 183  | 107  | 70   | 198      | 208  | 181  | 92   | 114  | 138  | 88   | 35   | 147      | 103  |
| Bi                             | 0.3       | 0.1  | 0.2  | 0.5  | 0.2      | 0.1  | 0.2  | 0.8  | 0.3  | 0.1  | 0.1  | 0.4  | 0.2      | 1.5  |
| Th                             | 0.4       | 0.1  | 0.1  | 0.1  | 0.5      | 0.2  | 0.1  | 0.2  | 0.6  | 0.1  | 0.04 | 0.1  | 0.1      | 0.2  |
| U                              | 0.6       | 0.1  | 0.12 | 0.1  | 0.9      | 0.1  | 0.2  | 0.1  | 0.9  | 0.1  | 0.1  | 0.04 | 0.2      | 0.1  |
| Mn                             | 8         | 11   | 8    | 8    | 8        | 7    | 6    | 7    | 6    | 7    | 5    | 6    | 7        | 7    |

**Table Electronic Supplementary Information 2. Contribution of each source to specific elements and components. In bold: those higher than 60% and 35% (for indeterminate).**

| %                              | Mineral   |           | Industrial 1 |           | Regional background |           | Industrial 2 |           | Sea spray |           | Road traffic |           | Indeterminate |           |
|--------------------------------|-----------|-----------|--------------|-----------|---------------------|-----------|--------------|-----------|-----------|-----------|--------------|-----------|---------------|-----------|
|                                | Min       | max       | min          | max       | min                 | max       | min          | max       | min       | max       | min          | max       | min           | max       |
| As                             | 1         | 20        | <b>68</b>    | <b>84</b> | <1                  | 5         | <1           | 7         | 1         | 18        | <1           | 11        | <1            | <1        |
| Ca                             | 48        | <b>81</b> | <1           | 5         | <1                  | 12        | <1           | 3         | <1        | 2         | 9            | 22        | 4             | 27        |
| K                              | 43        | 44        | 32           | 37        | 4                   | 15        | 2            | 6         | <1        | 1         | 2            | 14        | <1            | 4         |
| Pb                             | 6         | 15        | <b>58</b>    | <b>77</b> | <1                  | 10        | <1           | 5         | <1        | 3         | 8            | 18        | <1            | <1        |
| Al <sub>2</sub> O <sub>3</sub> | <b>64</b> | <b>84</b> | 10           | 24        | 1                   | 10        | 2            | 4         | <1        | 1         | <1           | 5         | <1            | 5         |
| Na                             | 1         | 18        | <1           | 9         | 16                  | <b>55</b> | <1           | 5         | 19        | <b>51</b> | <1           | 5         | 20            | <b>43</b> |
| SO <sub>4</sub> <sup>2-</sup>  | 5         | 25        | <1           | 8         | 45                  | <b>75</b> | <1           | 7         | 2         | 13        | <1           | 13        | <1            | 26        |
| NO <sub>3</sub> <sup>-</sup>   | <1        | 15        | <1           | 7         | 2                   | <b>61</b> | 1            | 12        | <1        | 14        | 4            | <b>92</b> | <1            | <1        |
| NH <sub>4</sub> <sup>+</sup>   | <1        | 3         | <1           | <1        | 49                  | <b>96</b> | 2            | 10        | <1        | <1        | <1           | <b>51</b> | <1            | <1        |
| V                              | 20        | 46        | <1           | 9         | 48                  | <b>70</b> | <1           | <1        | 1         | 10        | <1           | 2         | <1            | <1        |
| Ni                             | 12        | 40        | <1           | 11        | <b>58</b>           | <b>67</b> | <1           | <1        | <1        | 1         | <1           | 19        | <1            | <1        |
| Zn                             | 10        | 21        | <b>61</b>    | <b>77</b> | <1                  | 17        | <1           | 4         | <1        | 5         | <1           | 2         | <1            | <1        |
| OC+EC                          | 3         | 19        | 11           | 18        | <1                  | 9         | 2            | 12        | <1        | <1        | 30           | 35        | 17            | <b>51</b> |
| Zr                             | 18        | 46        | 14           | 23        | <1                  | <1        | 15           | <b>53</b> | 2         | 4         | 12           | 27        | <1            | 4         |
| Tl                             | 14        | 33        | 30           | <b>60</b> | <1                  | 6         | 3            | 19        | <1        | <1        | 1            | 21        | <1            | 31        |
| Mg                             | 50        | <b>64</b> | <1           | 6         | 12                  | 27        | <1           | 2         | 8         | 24        | <1           | 5         | 8             | 16        |
| Fe                             | <b>67</b> | <b>80</b> | 6            | 14        | 6                   | 13        | 1            | 5         | <1        | 1         | 1            | 8         | <1            | <1        |
| Ti                             | <b>63</b> | <b>81</b> | 5            | 23        | 6                   | 12        | <1           | 3         | <1        | 2         | <1           | 9         | <1            | 1         |
| P                              | 33        | <b>52</b> | 11           | 26        | 12                  | 26        | <1           | 1         | <1        | <1        | <1           | 19        | <1            | <b>39</b> |
| Cl                             | <1        | 34        | 20           | 36        | <1                  | <1        | 2            | 8         | 4         | 19        | 15           | 33        | <1            | <b>46</b> |
| Li                             | 46        | <b>59</b> | 25           | 32        | <1                  | 15        | 2            | 10        | <1        | <1        | <1           | 12        | <1            | 3         |
| Cr                             | 30        | 45        | 6            | 36        | 16                  | 22        | <1           | 5         | <1        | <1        | <1           | 25        | <1            | 31        |
| Co                             | 35        | <b>52</b> | 11           | 31        | 19                  | 23        | <1           | 2         | <1        | 2         | <1           | 14        | <1            | 25        |
| Cu                             | 22        | <b>53</b> | 8            | 21        | 1                   | 39        | <1           | 3         | <1        | <1        | 10           | <b>56</b> | <1            | <b>40</b> |
| Se                             | 19        | 33        | 35           | 46        | <1                  | 18        | 2            | 23        | <1        | <1        | <1           | 26        | <1            | 18        |
| Rb                             | 42        | <b>59</b> | 31           | 46        | <1                  | 10        | 3            | 9         | <1        | <1        | 1            | 11        | <1            | 1         |
| Sr                             | <b>59</b> | <b>69</b> | 8            | 11        | 2                   | 18        | 1            | 7         | 2         | 12        | 2            | 12        | <1            | 8         |
| Y                              | <b>70</b> | <b>87</b> | <1           | 15        | <1                  | 9         | 3            | 6         | <1        | 2         | <1           | 21        | <1            | <1        |
| Cd                             | <1        | 33        | <1           | <b>60</b> | 6                   | 35        | 2            | 29        | <1        | 24        | <1           | 32        | <1            | <1        |
| Sn                             | 2         | 30        | 15           | 38        | <1                  | 14        | <1           | 17        | <1        | <1        | 3            | 33        | <1            | <b>79</b> |
| Cs                             | 23        | 47        | 48           | <b>62</b> | <1                  | <1        | 3            | 9         | <1        | 2         | <1           | 13        | <1            | <1        |
| Ba                             | 21        | <b>64</b> | 23           | 36        | <1                  | 21        | <1           | 12        | 2         | 40        | <1           | 4         | <1            | <b>48</b> |
| La                             | <b>57</b> | <b>68</b> | 12           | 22        | 13                  | 25        | 3            | 6         | <1        | <1        | <1           | 2         | <1            | <1        |
| Ce                             | 20        | <b>80</b> | 3            | 13        | <1                  | 6         | 9            | <b>77</b> | <1        | 30        | <1           | 1         | <1            | <1        |
| Pr                             | <b>61</b> | <b>69</b> | 14           | 23        | 1                   | 8         | 4            | 9         | <1        | 1         | <1           | 11        | <1            | 11        |
| Nd                             | <b>67</b> | <b>76</b> | 9            | 23        | <1                  | 10        | 4            | 8         | <1        | 1         | <1           | 6         | <1            | <1        |
| Hf                             | 16        | 47        | 10           | 20        | <1                  | 6         | 17           | <b>62</b> | <1        | 1         | 5            | 28        | <1            | 8         |
| Bi                             | 3         | 17        | <1           | 13        | 12                  | <b>58</b> | <1           | 19        | <1        | <1        | <1           | 30        | <1            | <b>58</b> |
| Th                             | 27        | <b>71</b> | 7            | 29        | <1                  | <1        | 12           | 26        | <1        | 2         | <1           | 16        | <1            | 27        |
| U                              | <1        | <b>54</b> | 22           | 44        | <1                  | 2         | 2            | 38        | <1        | <1        | <1           | 10        | <1            | <b>66</b> |
| Mn                             | <b>56</b> | <b>77</b> | 1            | 9         | 13                  | 26        | <1           | 5         | <1        | 5         | <1           | 10        | <1            | 5         |
| Sc                             | 42        | <b>68</b> | <1           | 32        | <1                  | 19        | <1           | 10        | <1        | 15        | <1           | 14        | <1            | 17        |
